# Supplementary material
Source: MDPI journal article supplement (https://www.mdpi.com/2624-781X/4/3/31)
Supplement: s1 [file s1]

Supplementary Materials

# Comparative Analysis of Bio- and Chemo-Catalysts for the Synthesis of Flavour Compound Hexanal from Linoleic Acid

Jan Drönner <sup>†</sup>, Valentin Gala Marti <sup>†</sup>, Simone Bandte, Anna Coenen, Ulrich Schörken and Matthias Eisenacher <sup>\*</sup>

Circular Transformation Lab Cologne, TH Köln-University of Applied Sciences, 51379 Leverkusen, Germany

<sup>\*</sup> Correspondence: matthias.eisenacher@th-koeln.de; Tel.: +49-214-32831-4686

<sup>†</sup> These authors contributed equally to this work.

## Gas-Chromatography

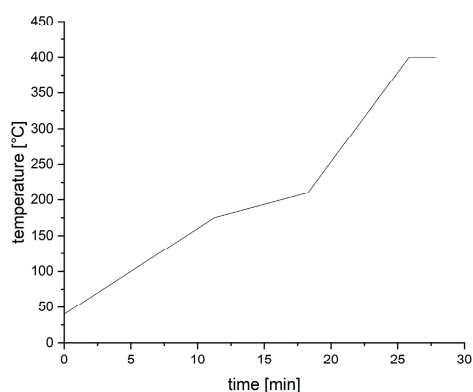

Figure S1: Temperature profile of the used measurement method for gas chromatography.

## HPLC

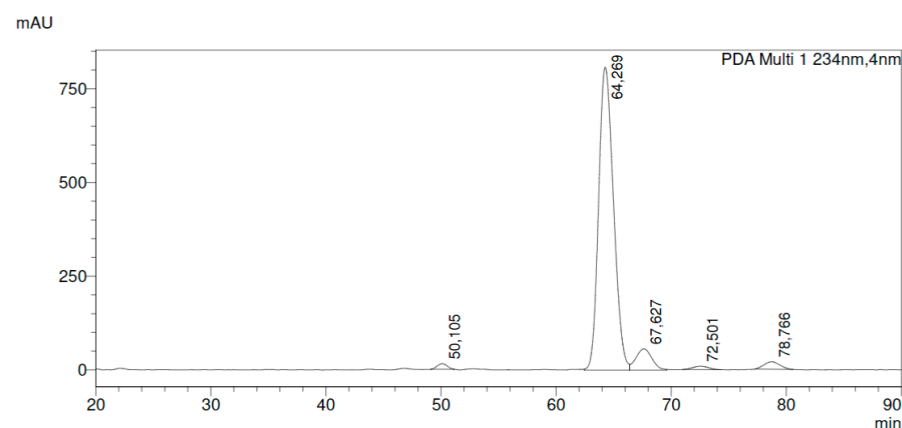

### <Peak Table>

| Peak# | Ret. Time | Area     | Height | Conc. | Unit | Mark | Name    |
|-------|-----------|----------|--------|-------|------|------|---------|
| 1     | 50.105    | 902367   | 14925  | 0,000 |      | M    |         |
| 2     | 64.269    | 72595121 | 808568 | 0,000 | mg/L | M    | 13-HPOD |
| 3     | 67.627    | 5514011  | 56944  | 0,000 | mg/L | M    | 9-HPOD  |
| 4     | 72.501    | 863008   | 9199   | 0,000 |      | M    |         |
| 5     | 78.766    | 1884885  | 19718  | 0,000 |      | M    |         |
| Total |           | 81759393 | 909354 |       |      |      |         |

Figure S2: HPLC chromatogram of H1 with 13-HPOD at 63.351 min and 9-HPOD at 66.635 min. Detector: PDA at 234 nm.

## GC-MS

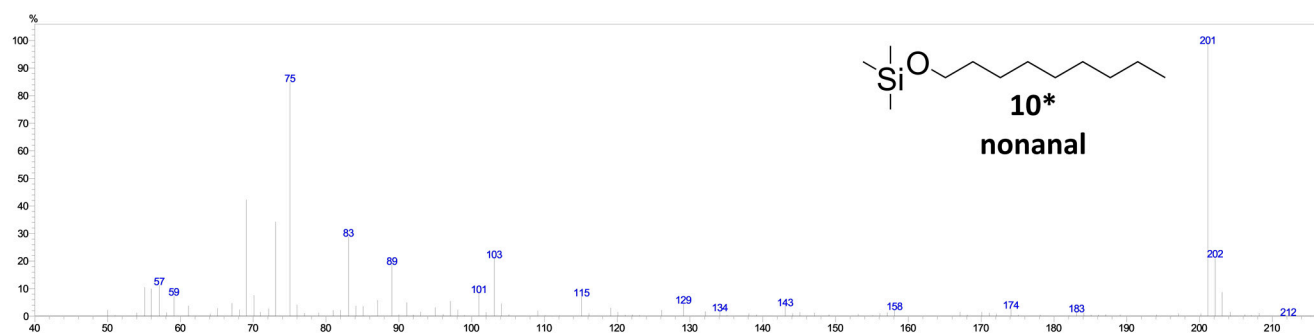

Figure S3: Example mass spectrum of reduced and silylated nonanal.

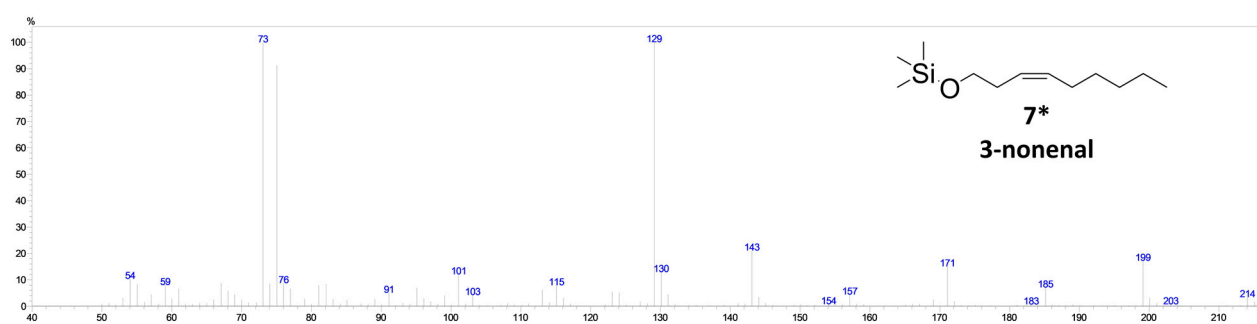

Figure S4: Example mass spectrum of reduced and silylated 3-nonenal.

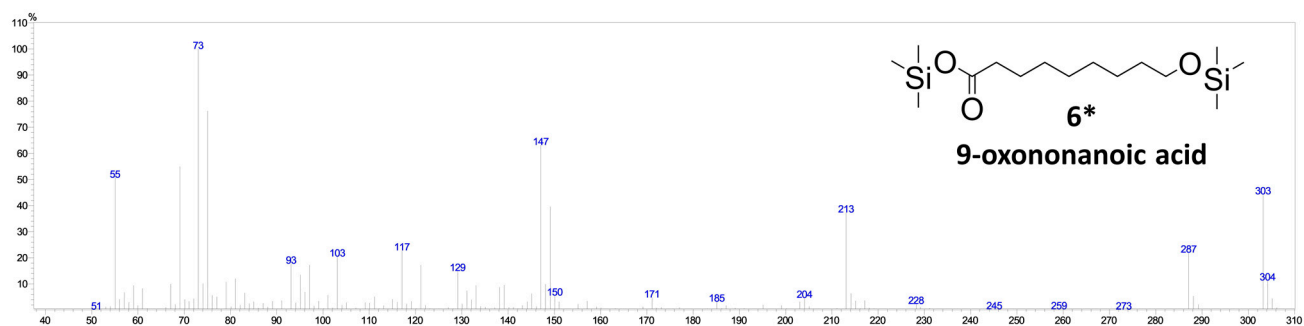

Figure S5: Example mass spectrum of reduced and silylated 9-oxononanoic acid.

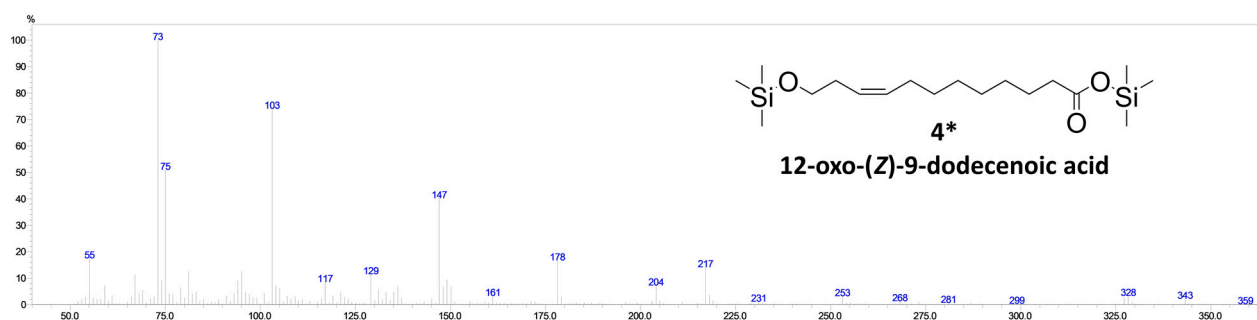

Figure S6: Example mass spectrum of reduced and silylated 12-oxo-9(Z)-oxononanoic acid.

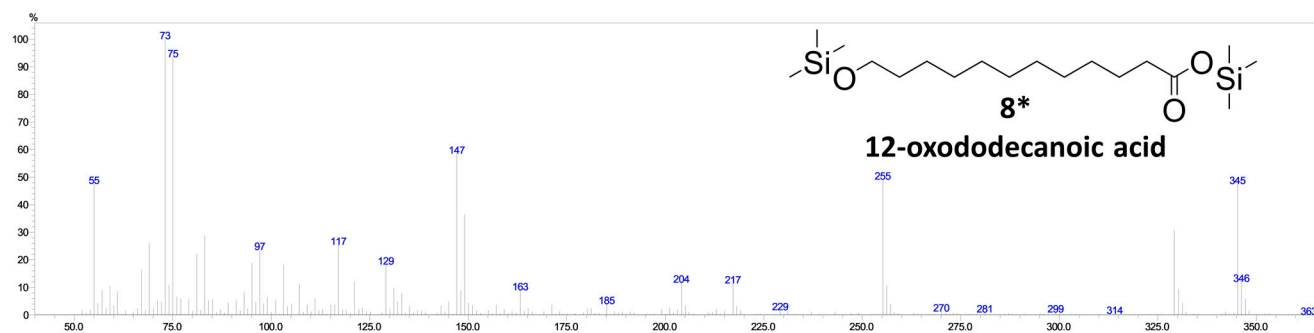

Figure S7: Example mass spectrum of reduced and silylated 12-oxododecanoic acid.

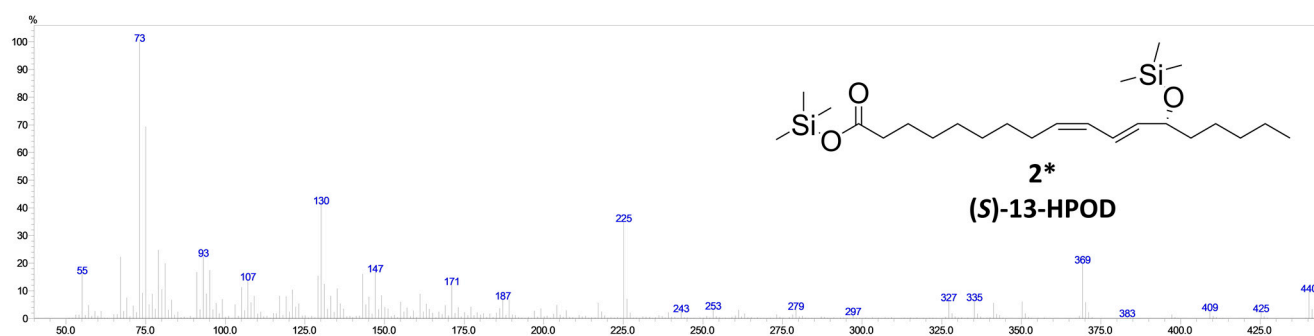

Figure S8: Example mass spectrum of reduced and silylated (S)-13-HPODE.

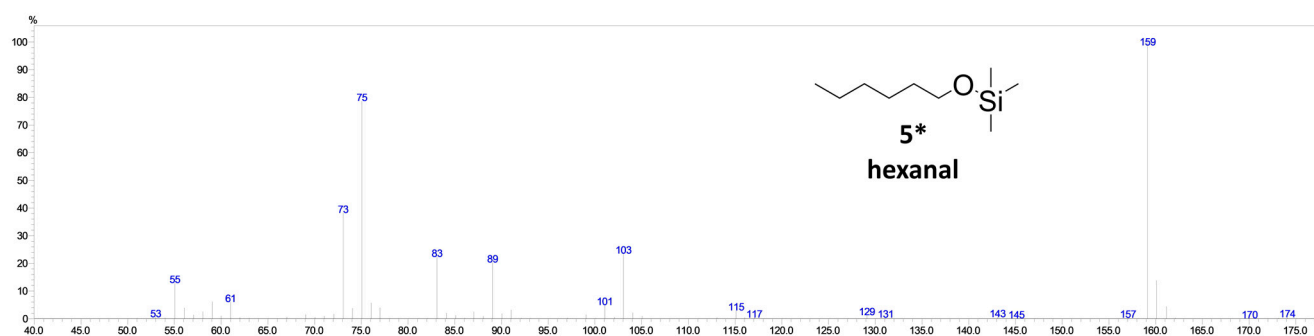

Figure S9: Example mass spectrum of reduced and silylated hexanal.

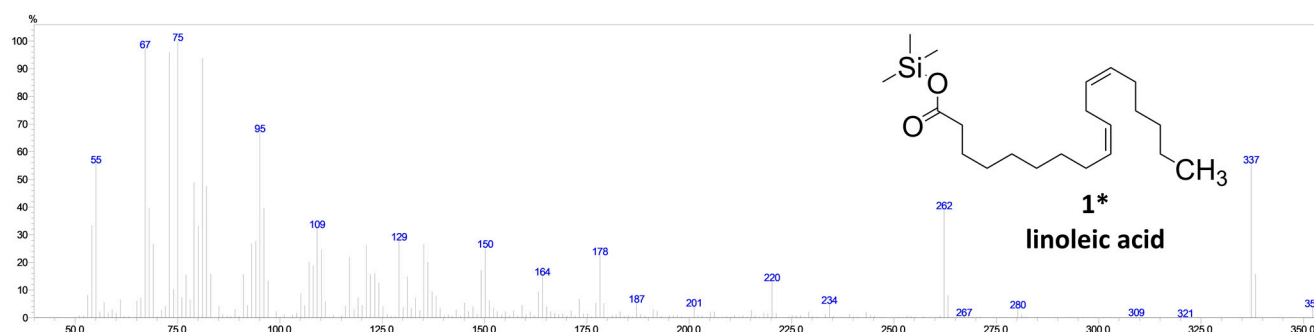

Figure S10: Example mass spectrum of reduced and silylated linoleic acid.

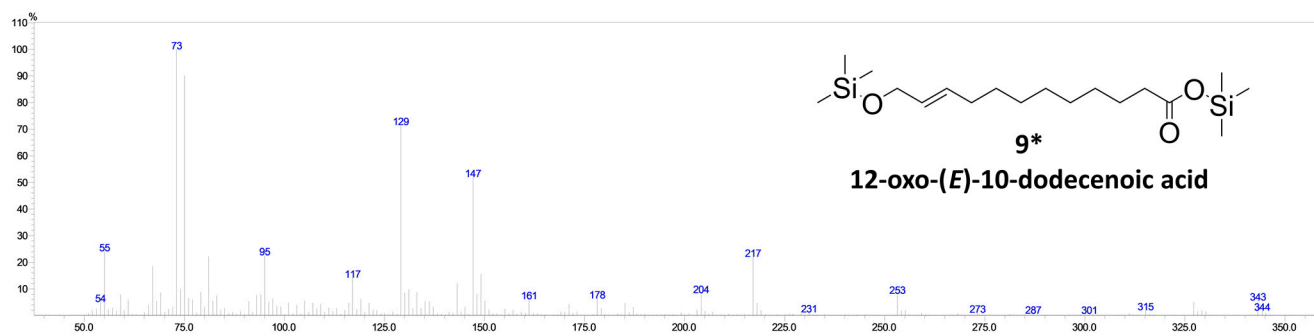

Figure S11: Example mass spectrum of reduced and silylated 12-oxo-10(*E*)-dodecenoic acid.
